# Supplementary material
Source: publisher figshare collection journal article supplement (https://rs.figshare.com/ndownloader/files/17842814)
Supplement: Supplementary file 1 [file 17842814]

30	0.01	0.7	-1	1	0.03	0.04	0.4	0.9	10	1	110.24	0
30	0.2	0.7	-1	1	0.03	0.04	0.4	0.7	10	1	204.36	5e-05
30	0.01	0.7	-1	1	0.03	0.04	0.4	0.8	10	1	123.59	0
30	0.4	0.7	-1	1	0.03	0.04	0.4	0.8	10	1	260.03	0.0001
30	0.1	0.7	-1	1	0.03	0.04	0.4	0.9	10	1	138.93	0
30	0.01	0.7	-1	1	0.03	0.04	0.4	0.7	10	1	139.79	0
40	0.01	0.7	-1	1	0.03	0.04	0.4	0.9	10	1	149.36	0
30	0.2	0.7	-1	1	0.03	0.04	0.4	0.9	10	1	165.69	0
40	0.01	0.7	-1	1	0.03	0.04	0.4	0.8	10	1	168.29	0
30	0.1	0.7	-1	1	0.03	0.04	0.4	0.7	10	1	175.9	1e-05
30	0.1	0.7	-1	1	0.03	0.04	0.4	0.8	10	1	155.72	0
50	0.01	0.6	-1	1	0.03	0.04	0.4	0.5	10	1	333.77	0
30	0.3	0.7	-1	1	0.03	0.04	0.4	0.9	10	1	196.34	1e-05
30	0.2	0.7	-1	1	0.03	0.04	0.4	0.8	10	1	182.72	2e-05
40	0.1	0.7	-1	1	0.03	0.04	0.4	0.9	10	1	192.26	0
40	0.1	0.7	-1	1	0.03	0.04	0.4	0.8	10	1	213.67	0
30	0.3	0.7	-1	1	0.03	0.04	0.4	0.7	10	1	240.9	8e-05
30	0.3	0.7	-1	1	0.03	0.04	0.4	0.8	10	1	219.37	5e-05
40	0.01	0.7	-1	1	0.03	0.04	0.4	0.7	10	1	190.71	0
30	0.01	0.6	-1	1	0.03	0.04	0.4	0.6	10	1	165.14	1e-05
30	0.4	0.7	-1	1	0.03	0.04	0.4	0.7	10	1	286.29	0.00037
40	0.1	0.7	-1	1	0.03	0.04	0.4	0.7	10	1	236.48	0
50	0.01	0.7	-1	1	0.03	0.04	0.4	0.9	10	1	190.27	0
20	0.3	0.3	-1	1	0.03	0.04	0.4	0	10	1	197.38	0.0389
30	0.4	0.7	-1	1	0.03	0.04	0.4	0.9	10	1	236.82	4e-05
20	0.8	0.3	-1	1	0.03	0.04	0.4	0	10	1	217.13	0.02664
20	0.7	0.4	-1	1	0.03	0.04	0.4	0.1	10	1	236.73	0.02941
40	0.01	0.6	-1	1	0.03	0.04	0.4	0.6	10	1	227.46	0
50	0.01	0.7	-1	1	0.03	0.04	0.4	0.8	10	1	209.85	0
40	0.2	0.7	-1	1	0.03	0.04	0.4	0.8	10	1	250.75	0
40	0.2	0.7	-1	1	0.03	0.04	0.4	0.9	10	1	226.55	0
40	0.3	0.7	-1	1	0.03	0.04	0.4	0.9	10	1	269.61	0
20	0.8	0.4	-1	1	0.03	0.04	0.4	0.2	10	1	260.21	0.03122
30	0.01	0.6	-1	1	0.03	0.04	0.4	0.5	10	1	192.19	0.00021
20	0.2	0.4	-1	1	0.03	0.04	0.4	0.1	10	1	193.19	0.0346
20	0.99	0.3	-1	1	0.03	0.04	0.4	0	10	1	211.61	0.01957
20	0.99	0.4	-1	1	0.03	0.04	0.4	0.1	10	1	255.54	0.02453
20	0.9	0.3	-1	1	0.03	0.04	0.4	0	10	1	215.64	0.02274
30	0.1	0.6	-1	1	0.03	0.04	0.4	0.6	10	1	198.12	0.00016
40	0.3	0.7	-1	1	0.03	0.04	0.4	0.8	10	1	295.25	0
30	0.5	0.7	-1	1	0.03	0.04	0.4	0.8	10	1	324.1	0.00025
20	0.9	0.4	-1	1	0.03	0.04	0.4	0.1	10	1	250.6	0.02556
20	0.2	0.6	-1	1	0.03	0.04	0.4	0.4	10	1	170.29	0.01128
30	0.5	0.7	-1	1	0.03	0.04	0.4	0.9	10	1	295.9	0.0001
30	0.99	0.4	-1	1	0.03	0.04	0.4	0.1	10	1	523.17	0.01054
20	0.01	0.5	-1	1	0.03	0.04	0.4	0.3	10	1	155.37	0.0159
50	0.01	0.6	-1	1	0.03	0.04	0.4	0.7	10	1	243.23	0
50	0.2	0.7	-1	1	0.03	0.04	0.4	0.9	10	1	285.48	0
20	0.7	0.3	-1	1	0.03	0.04	0.4	0	10	1	214.13	0.02976
20	0.99	0.4	-1	1	0.03	0.04	0.4	0.2	10	1	284.03	0.03416
20	0.3	0.5	-1	1	0.03	0.04	0.4	0.3	10	1	195.72	0.01967
50	0.1	0.7	-1	1	0.03	0.04	0.4	0.9	10	1	242.36	0
40	0.01	0.6	-1	1	0.03	0.04	0.4	0.5	10	1	265.85	2e-05
40	0.4	0.7	-1	1	0.03	0.04	0.4	0.9	10	1	325.68	0
30	0.6	0.7	-1	1	0.03	0.04	0.4	0.7	10	1	441.81	0.00139
50	0.1	0.7	-1	1	0.03	0.04	0.4	0.8	10	1	269.44	0
30	0.1	0.6	-1	1	0.03	0.04	0.4	0.5	10	1	227.25	0.00048
30	0.2	0.6	-1	1	0.03	0.04	0.4	0.6	10	1	228.82	0.00032
30	0.3	0.6	-1	1	0.03	0.04	0.4	0.5	10	1	305.77	0.00163
20	0.4	0.3	-1	1	0.03	0.04	0.4	0	10	1	200.94	0.03638
20	0.4	0.6	-1	1	0.03	0.04	0.4	0.4	10	1	206.41	0.01501
40	0.2	0.7	-1	1	0.03	0.04	0.4	0.7	10	1	282.06	0
20	0.1	0.5	-1	1	0.03	0.04	0.4	0.3	10	1	164.62	0.01708
20	0.8	0.4	-1	1	0.03	0.04	0.4	0.1	10	1	245	0.02802
20	0.6	0.6	-1	1	0.03	0.04	0.4	0.4	10	1	262.57	0.01957
20	0.3	0.4	-1	1	0.03	0.04	0.4	0.1	10	1	199.2	0.03317
20	0.01	0.4	-1	1	0.03	0.04	0.4	0.2	10	1	168.31	0.02575
20	0.3	0.6	-1	1	0.03	0.04	0.4	0.4	10	1	189.11	0.01381
20	0.2	0.5	-1	1	0.03	0.04	0.4	0.3	10	1	179.57	0.01903
20	0.4	0.5	-1	1	0.03	0.04	0.4	0.3	10	1	208.92	0.02144
20	0.6	0.3	-1	1	0.03	0.04	0.4	0	10	1	215.05	0.03281
20	0.1	0.6	-1	1	0.03	0.04	0.4	0.4	10	1	153.89	0.00942
20	0.3	0.4	-1	1	0.03	0.04	0.4	0.2	10	1	193.08	0.02771
20	0.1	0.4	-1	1	0.03	0.04	0.4	0.1	10	1	184.23	0.03467
20	0.6	0.4	-1	1	0.03	0.04	0.4	0.1	10	1	231.05	0.0303
20	0.99	0.5	-1	1	0.03	0.04	0.4	0.3	10	1	355.49	0.04049
20	0.7	0.4	-1	1	0.03	0.04	0.4	0.2	10	1	246.07	0.03047
20	0.1	0.4	-1	1	0.03	0.04	0.4	0.2	10	1	174.42	0.02565
20	0.5	0.3	-1	1	0.03	0.04	0.4	0	10	1	209.96	0.03464
20	0.2	0.4	-1	1	0.03	0.04	0.4	0.2	10	1	183.91	0.02565
30	0.6	0.7	-1	1	0.03	0.04	0.4	0.8	10	1	408.33	0.00081
20	0.5	0.5	-1	1	0.03	0.04	0.4	0.3	10	1	231.5	0.02362
10	0.6	0.7	-1	1	0.03	0.04	0.4	0.9	10	1	75.575	0.04398
20	0.4	0.4	-1	1	0.03	0.04	0.4	0.2	10	1	207.86	0.02867
40	0.1	0.6	-1	1	0.03	0.04	0.4	0.6	10	1	271.8	0
20	0.4	0.4	-1	1	0.03	0.04	0.4	0.1	10	1	209.33	0.03283
20	0.2	0.3	-1	1	0.03	0.04	0.4	0	10	1	190.7	0.04027
20	0.1	0.3	-1	1	0.03	0.04	0.4	0	10	1	186.08	0.04372
30	0.2	0.4	-1	1	0.03	0.04	0.4	0.2	10	1	359.26	0.01131
10	0.01	0.7	-1	1	0.03	0.04	0.4	0.7	10	1	36.554	0.01183
10	0.7	0.7	-1	1	0.03	0.04	0.4	0.9	10	1	88.599	0.05854
20	0.5	0.6	-1	1	0.03	0.04	0.4	0.4	10	1	237.79	0.01749
10	0.8	0.7	-1	1	0.03	0.04	0.4	0.9	10	1	105.9	0.07977
10	0.01	0.7	-1	1	0.03	0.04	0.4	0.8	10	1	33.468	0.00561
10	0.2	0.7	-1	1	0.03	0.04	0.4	0.7	10	1	48.151	0.02687
20	0.01	0.7	-1	1	0.03	0.04	0.4	0.9	10	1	70.44	1e-05
40	0.4	0.7	-1	1	0.03	0.04	0.4	0.8	10	1	351.88	0
10	0.2	0.7	-1	1	0.03	0.04	0.4	0.8	10	1	45.815	0.01954
10	0.01	0.7	-1	1	0.03	0.04	0.4	0.9	10	1	30.572	0.0017
50	0.1	0.6	-1	1	0.03	0.04	0.4	0.7	10	1	301.64	0
10	0.1	0.4	-1	1	0.03	0.04	0.4	0.1	10	1	52.032	0.08938
10	0.3	0.4	-1	1	0.03	0.04	0.4	0.2	10	1	55.125	0.08307
30	0.1	0.6	-1	1	0.03	0.04	0.4	0.4	10	1	268.33	0.00169
10	0.1	0.6	-1	1	0.03	0.04	0.4	0.4	10	1	48.789	0.05652
20	0.01	0.3	-1	1	0.03	0.04	0.4	0	10	1	194.15	0.05228
40	0.1	0.6	-1	1	0.03	0.04	0.4	0.5	10	1	314.41	5e-05
30	0.2	0.6	-1	1	0.03	0.04	0.4	0.5	10	1	259.99	0.00084
20	0.6	0.5	-1	1	0.03	0.04	0.4	0.3	10	1	250.27	0.02542
20	0.7	0.5	-1	1	0.03	0.04	0.4	0.3	10	1	272.87	0.0272
10	0.6	0.4	-1	1	0.03	0.04	0.4	0.2	10	1	61.752	0.08213
10	0.1	0.7	-1	1	0.03	0.04	0.4	0.8	10	1	40.555	0.01242
10	0.1	0.5	-1	1	0.03	0.04	0.4	0.3	10	1	50.132	0.06897
10	0.9	0.7	-1	1	0.03	0.04	0.4	0.9	10	1	127.77	0.10611
10	0.99	0.7	-1	1	0.03	0.04	0.4	0.9	10	1	153.14	0.14653
10	0.1	0.7	-1	1	0.03	0.04	0.4	0.9	10	1	37.729	0.00656
40	0.6	0.7	-1	1	0.03	0.04	0.4	0.7	10	1	619.32	0.00026
20	0.4	0.6	-1	1	0.03	0.04	0.4	0.6	10	1	185.25	0.0068
10	0.2	0.7	-1	1	0.03	0.04	0.4	0.9	10	1	43.053	0.01102
50	0.4	0.6	-1	1	0.03	0.04	0.4	0.7	10	1	505.16	0
20	0.01	0.4	-1	1	0.03	0.04	0.4	0.1	10	1	183.04	0.03953
40	0.3	0.7	-1	1	0.03	0.04	0.4	0.7	10	1	331.45	0
20	0.5	0.4	-1	1	0.03	0.04	0.4	0.1	10	1	220.08	0.03185
10	0.1	0.7	-1	1	0.03	0.04	0.4	0.7	10	1	42.584	0.02197
10	0.01	0.6	-1	1	0.03	0.04	0.4	0.6	10	1	40.231	0.02325
10	0.7	0.7	-1	1	0.03	0.04	0.4	0.8	10	1	90.297	0.06253
10	0.01	0.6	-1	1	0.03	0.04	0.4	0.5	10	1	42.888	0.0358
10	0.2	0.6	-1	1	0.03	0.04	0.4	0.6	10	1	49.113	0.04032
10	0.1	0.6	-1	1	0.03	0.04	0.4	0.5	10	1	47.141	0.04515
10	0.1	0.6	-1	1	0.03	0.04	0.4	0.6	10	1	45.011	0.03364
10	0.99	0.4	-1	1	0.03	0.04	0.4	0.1	10	1	68.509	0.07183
30	0.01	0.6	-1	1	0.03	0.04	0.4	0.4	10	1	233.2	0.00098
10	0.01	0.6	-1	1	0.03	0.04	0.4	0.4	10	1	44.963	0.05037
10	0.3	0.7	-1	1	0.03	0.04	0.4	0.8	10	1	51.808	0.0252
10	0.8	0.3	-1	1	0.03	0.04	0.4	0	10	1	59.084	0.07609
20	0.5	0.4	-1	1	0.03	0.04	0.4	0.2	10	1	217.53	0.02829
20	0.9	0.4	-1	1	0.03	0.04	0.4	0.2	10	1	269.93	0.03243
10	0.7	0.6	-1	1	0.03	0.04	0.4	0.6	10	1	79.982	0.07516
10	0.99	0.4	-1	1	0.03	0.04	0.4	0.2	10	1	71.312	0.08329
10	0.2	0.5	-1	1	0.03	0.04	0.4	0.3	10	1	52.798	0.06921
10	0.3	0.7	-1	1	0.03	0.04	0.4	0.9	10	1	49.557	0.01739
10	0.4	0.7	-1	1	0.03	0.04	0.4	0.8	10	1	58.764	0.03149
10	0.2	0.6	-1	1	0.03	0.04	0.4	0.4	10	1	52.591	0.0607
10	0.2	0.6	-1	1	0.03	0.04	0.4	0.5	10	1	51.137	0.04884
20	0.01	0.7	-1	1	0.03	0.04	0.4	0.8	10	1	78.379	1e-05
10	0.3	0.6	-1	1	0.03	0.04	0.4	0.4	10	1	56.554	0.06291
10	0.01	0.5	-1	1	0.03	0.04	0.4	0.3	10	1	47.703	0.06697
20	0.6	0.4	-1	1	0.03	0.04	0.4	0.2	10	1	233.44	0.0303
20	0.01	0.7	-1	1	0.03	0.04	0.4	0.7	10	1	89.676	0.00019
10	0.99	0.5	-1	1	0.03	0.04	0.4	0.3	10	1	86.63	0.09097
30	0.4	0.6	-1	1	0.03	0.04	0.4	0.6	10	1	317.77	0.00106
10	0.4	0.7	-1	1	0.03	0.04	0.4	0.9	10	1	56.654	0.02454
10	0.3	0.3	-1	1	0.03	0.04	0.4	0	10	1	54.594	0.09113
10	0.5	0.4	-1	1	0.03	0.04	0.4	0.2	10	1	59.92	0.08294
10	0.3	0.6	-1	1	0.03	0.04	0.4	0.6	10	1	54.49	0.0457
10	0.01	0.4	-1	1	0.03	0.04	0.4	0.2	10	1	49.59	0.08211
10	0.2	0.4	-1	1	0.03	0.04	0.4	0.2	10	1	52.836	0.08047
10	0.8	0.4	-1	1	0.03	0.04	0.4	0.2	10	1	67.943	0.08395
10	0.4	0.6	-1	1	0.03	0.04	0.4	0.6	10	1	58.852	0.05077
10	0.7	0.4	-1	1	0.03	0.04	0.4	0.2	10	1	64.949	0.08227
10	0.99	0.3	-1	1	0.03	0.04	0.4	0	10	1	58.35	0.06463
10	0.6	0.5	-1	1	0.03	0.04	0.4	0.3	10	1	67.565	0.07913
10	0.3	0.6	-1	1	0.03	0.04	0.4	0.5	10	1	55.584	0.05399
10	0.4	0.6	-1	1	0.03	0.04	0.4	0.5	10	1	60.686	0.05922
10	0.9	0.5	-1	1	0.03	0.04	0.4	0.3	10	1	81.441	0.08641
10	0.9	0.3	-1	1	0.03	0.04	0.4	0	10	1	59.222	0.07086
10	0.99	0.6	-1	1	0.03	0.04	0.4	0.6	10	1	112.53	0.11869
10	0.3	0.5	-1	1	0.03	0.04	0.4	0.3	10	1	56.118	0.07311
10	0.5	0.7	-1	1	0.03	0.04	0.4	0.8	10	1	67.011	0.04126
10	0.3	0.7	-1	1	0.03	0.04	0.4	0.7	10	1	53.215	0.03352
10	0.7	0.5	-1	1	0.03	0.04	0.4	0.3	10	1	71.839	0.08012
10	0.9	0.4	-1	1	0.03	0.04	0.4	0.2	10	1	69.388	0.08493
20	0.01	0.6	-1	1	0.03	0.04	0.4	0.6	10	1	104.24	0.00092
10	0.4	0.4	-1	1	0.03	0.04	0.4	0.1	10	1	58.337	0.08664
10	0.4	0.5	-1	1	0.03	0.04	0.4	0.3	10	1	59.852	0.07429
10	0.5	0.6	-1	1	0.03	0.04	0.4	0.5	10	1	66.49	0.06344
10	0.6	0.7	-1	1	0.03	0.04	0.4	0.8	10	1	77.067	0.0508
10	0.5	0.4	-1	1	0.03	0.04	0.4	0.1	10	1	60.268	0.08441
10	0.5	0.5	-1	1	0.03	0.04	0.4	0.3	10	1	64.059	0.0767
40	0.2	0.6	-1	1	0.03	0.04	0.4	0.6	10	1	321.96	5e-05
10	0.6	0.4	-1	1	0.03	0.04	0.4	0.1	10	1	62.305	0.08189
10	0.7	0.4	-1	1	0.03	0.04	0.4	0.1	10	1	64.228	0.08061
10	0.2	0.3	-1	1	0.03	0.04	0.4	0	10	1	54.051	0.09401
10	0.6	0.6	-1	1	0.03	0.04	0.4	0.5	10	1	73.071	0.0698
10	0.4	0.4	-1	1	0.03	0.04	0.4	0.2	10	1	57.406	0.08355
10	0.8	0.4	-1	1	0.03	0.04	0.4	0.1	10	1	66.923	0.07953
10	0.5	0.6	-1	1	0.03	0.04	0.4	0.6	10	1	65.526	0.05879
10	0.99	0.6	-1	1	0.03	0.04	0.4	0.5	10	1	111.55	0.1092
20	0.1	0.7	-1	1	0.03	0.04	0.4	0.8	10	1	98.379	0.00017
10	0.4	0.7	-1	1	0.03	0.04	0.4	0.7	10	1	60.252	0.04012
10	0.6	0.7	-1	1	0.03	0.04	0.4	0.7	10	1	78.18	0.05483
10	0.9	0.4	-1	1	0.03	0.04	0.4	0.1	10	1	67.403	0.07389
10	0.1	0.4	-1	1	0.03	0.04	0.4	0.2	10	1	51.085	0.08165
10	0.5	0.3	-1	1	0.03	0.04	0.4	0	10	1	56.332	0.08643
10	0.2	0.4	-1	1	0.03	0.04	0.4	0.1	10	1	53.763	0.08765
20	0.9	0.5	-1	1	0.03	0.04	0.4	0.3	10	1	319.82	0.03394
10	0.8	0.5	-1	1	0.03	0.04	0.4	0.3	10	1	77.134	0.08161
10	0.4	0.3	-1	1	0.03	0.04	0.4	0	10	1	55.517	0.08963
30	0.2	0.6	-1	1	0.03	0.04	0.4	0.4	10	1	299.38	0.00268
10	0.5	0.6	-1	1	0.03	0.04	0.4	0.4	10	1	67.087	0.06987
10	0.5	0.7	-1	1	0.03	0.04	0.4	0.7	10	1	68.437	0.04714
10	0.6	0.3	-1	1	0.03	0.04	0.4	0	10	1	57.308	0.08332
10	0.01	0.3	-1	1	0.03	0.04	0.4	0	10	1	53.742	0.10506
10	0.6	0.6	-1	1	0.03	0.04	0.4	0.6	10	1	72.421	0.0653
10	0.3	0.4	-1	1	0.03	0.04	0.4	0.1	10	1	56.028	0.08603
20	0.8	0.5	-1	1	0.03	0.04	0.4	0.3	10	1	294.88	0.02983
10	0.8	0.6	-1	1	0.03	0.04	0.4	0.4	10	1	89.161	0.08019
10	0.01	0.4	-1	1	0.03	0.04	0.4	0.1	10	1	51.724	0.09666
10	0.8	0.6	-1	1	0.03	0.04	0.4	0.5	10	1	89.313	0.0835
10	0.99	0.6	-1	1	0.03	0.04	0.4	0.4	10	1	107.45	0.0949
10	0.1	0.3	-1	1	0.03	0.04	0.4	0	10	1	53.194	0.09704
10	0.4	0.6	-1	1	0.03	0.04	0.4	0.4	10	1	62.052	0.06684
10	0.7	0.3	-1	1	0.03	0.04	0.4	0	10	1	58.281	0.08063
10	0.8	0.6	-1	1	0.03	0.04	0.4	0.6	10	1	89.785	0.08603
10	0.7	0.6	-1	1	0.03	0.04	0.4	0.5	10	1	80.417	0.07456
10	0.9	0.6	-1	1	0.03	0.04	0.4	0.5	10	1	100.1	0.09354
20	0.2	0.7	-1	1	0.03	0.04	0.4	0.7	10	1	127.13	0.00103
10	0.9	0.6	-1	1	0.03	0.04	0.4	0.4	10	1	96.822	0.08547
10	0.9	0.6	-1	1	0.03	0.04	0.4	0.6	10	1	99.18	0.09799
10	0.7	0.7	-1	1	0.03	0.04	0.4	0.7	10	1	90.218	0.06501
10	0.6	0.6	-1	1	0.03	0.04	0.4	0.4	10	1	74.37	0.07284
30	0.5	0.7	-1	1	0.03	0.04	0.4	0.7	10	1	352.71	0.00061
10	0.8	0.7	-1	1	0.03	0.04	0.4	0.7	10	1	104.66	0.0776
30	0.4	0.6	-1	1	0.03	0.04	0.4	0.5	10	1	352.83	0.00212
20	0.2	0.7	-1	1	0.03	0.04	0.4	0.8	10	1	115.44	0.00032
10	0.5	0.7	-1	1	0.03	0.04	0.4	0.9	10	1	65.818	0.03433
10	0.99	0.7	-1	1	0.03	0.04	0.4	0.8	10	1	152.34	0.13332
30	0.4	0.6	-1	1	0.03	0.04	0.4	0.4	10	1	381.36	0.00425
30	0.4	0.4	-1	1	0.03	0.04	0.4	0.2	10	1	414.74	0.0128
40	0.5	0.7	-1	1	0.03	0.04	0.4	0.9	10	1	409.04	4e-05
10	0.9	0.7	-1	1	0.03	0.04	0.4	0.7	10	1	124.61	0.09464
10	0.8	0.7	-1	1	0.03	0.04	0.4	0.8	10	1	105.61	0.0773
10	0.99	0.7	-1	1	0.03	0.04	0.4	0.7	10	1	150.53	0.12088
20	0.01	0.6	-1	1	0.03	0.04	0.4	0.5	10	1	117.42	0.00289
20	0.1	0.7	-1	1	0.03	0.04	0.4	0.7	10	1	110.93	0.00059
20	0.3	0.7	-1	1	0.03	0.04	0.4	0.9	10	1	125.17	0.00029
20	0.1	0.7	-1	1	0.03	0.04	0.4	0.9	10	1	90.572	4e-05
10	0.9	0.7	-1	1	0.03	0.04	0.4	0.8	10	1	125.46	0.10032
40	0.01	0.6	-1	1	0.03	0.04	0.4	0.4	10	1	325.23	0.00016
20	0.99	0.6	-1	1	0.03	0.04	0.4	0.4	10	1	457.25	0.04686
20	0.4	0.7	-1	1	0.03	0.04	0.4	0.9	10	1	150.15	0.00076
30	0.3	0.6	-1	1	0.03	0.04	0.4	0.6	10	1	268.91	0.0005
20	0.2	0.7	-1	1	0.03	0.04	0.4	0.9	10	1	105.3	6e-05
20	0.3	0.7	-1	1	0.03	0.04	0.4	0.7	10	1	149.19	0.00179
20	0.2	0.6	-1	1	0.03	0.04	0.4	0.6	10	1	138.97	0.00314
20	0.7	0.6	-1	1	0.03	0.04	0.4	0.4	10	1	300.13	0.02382
20	0.1	0.6	-1	1	0.03	0.04	0.4	0.6	10	1	123.3	0.00209
20	0.5	0.7	-1	1	0.03	0.04	0.4	0.9	10	1	184.06	0.0018
20	0.9	0.6	-1	1	0.03	0.04	0.4	0.4	10	1	389.75	0.03505
30	0.3	0.6	-1	1	0.03	0.04	0.4	0.4	10	1	342.66	0.00313
50	0.01	0.6	-1	1	0.03	0.04	0.4	0.6	10	1	286.71	0
10	0.7	0.6	-1	1	0.03	0.04	0.4	0.4	10	1	80.687	0.07564
20	0.3	0.7	-1	1	0.03	0.04	0.4	0.8	10	1	136.16	0.00081
50	0.3	0.7	-1	1	0.03	0.04	0.4	0.9	10	1	340.67	0
20	0.8	0.6	-1	1	0.03	0.04	0.4	0.4	10	1	339.71	0.02788
20	0.01	0.6	-1	1	0.03	0.04	0.4	0.4	10	1	137.75	0.00766
20	0.3	0.6	-1	1	0.03	0.04	0.4	0.6	10	1	161.04	0.00482
20	0.1	0.6	-1	1	0.03	0.04	0.4	0.5	10	1	137.07	0.00462
20	0.4	0.7	-1	1	0.03	0.04	0.4	0.8	10	1	161.57	0.00142
20	0.6	0.6	-1	1	0.03	0.04	0.4	0.6	10	1	253.92	0.01431
30	0.1	0.4	-1	1	0.03	0.04	0.4	0.2	10	1	336.61	0.01054
40	0.5	0.7	-1	1	0.03	0.04	0.4	0.8	10	1	449.54	1e-05
20	0.2	0.6	-1	1	0.03	0.04	0.4	0.5	10	1	154.4	0.00614
20	0.99	0.7	-1	1	0.03	0.04	0.4	0.7	10	1	684.87	0.07656
40	0.2	0.6	-1	1	0.03	0.04	0.4	0.5	10	1	362.83	0.00018
20	0.7	0.6	-1	1	0.03	0.04	0.4	0.6	10	1	294.1	0.02107
50	0.3	0.7	-1	1	0.03	0.04	0.4	0.8	10	1	380.23	0
20	0.3	0.6	-1	1	0.03	0.04	0.4	0.5	10	1	175.61	0.00862
30	0.3	0.5	-1	1	0.03	0.04	0.4	0.3	10	1	372.12	0.00731
30	0.2	0.3	-1	1	0.03	0.04	0.4	0	10	1	404.71	0.02419
30	0.01	0.5	-1	1	0.03	0.04	0.4	0.3	10	1	280.34	0.00388
20	0.5	0.7	-1	1	0.03	0.04	0.4	0.8	10	1	197.49	0.00316
20	0.5	0.6	-1	1	0.03	0.04	0.4	0.6	10	1	215.06	0.01006
50	0.2	0.6	-1	1	0.03	0.04	0.4	0.7	10	1	352.88	0
40	0.6	0.7	-1	1	0.03	0.04	0.4	0.9	10	1	527.71	1e-05
20	0.4	0.7	-1	1	0.03	0.04	0.4	0.7	10	1	176.32	0.00341
50	0.1	0.6	-1	1	0.03	0.04	0.4	0.5	10	1	399.85	1e-05
30	0.01	0.4	-1	1	0.03	0.04	0.4	0.2	10	1	324.72	0.01122
20	0.5	0.7	-1	1	0.03	0.04	0.4	0.7	10	1	208.22	0.00543
30	0.7	0.7	-1	1	0.03	0.04	0.4	0.8	10	1	547.04	0.00263
20	0.9	0.6	-1	1	0.03	0.04	0.4	0.6	10	1	426.37	0.0464
20	0.6	0.7	-1	1	0.03	0.04	0.4	0.7	10	1	259.63	0.00841
30	0.1	0.5	-1	1	0.03	0.04	0.4	0.3	10	1	299.82	0.00521
40	0.3	0.6	-1	1	0.03	0.04	0.4	0.5	10	1	422.98	0.00032
20	0.4	0.6	-1	1	0.03	0.04	0.4	0.5	10	1	199.3	0.01099
20	0.6	0.7	-1	1	0.03	0.04	0.4	0.8	10	1	242.87	0.00589
20	0.6	0.7	-1	1	0.03	0.04	0.4	0.9	10	1	233.2	0.00399
30	0.99	0.3	-1	1	0.03	0.04	0.4	0	10	1	401.36	0.00724
20	0.8	0.7	-1	1	0.03	0.04	0.4	0.7	10	1	395.73	0.02282
30	0.6	0.6	-1	1	0.03	0.04	0.4	0.6	10	1	467.36	0.0041
30	0.8	0.6	-1	1	0.03	0.04	0.4	0.5	10	1	716.35	0.01364
50	0.4	0.7	-1	1	0.03	0.04	0.4	0.9	10	1	409.98	0
30	0.7	0.7	-1	1	0.03	0.04	0.4	0.9	10	1	524.1	0.00179
50	0.1	0.6	-1	1	0.03	0.04	0.4	0.6	10	1	347.71	0
20	0.8	0.6	-1	1	0.03	0.04	0.4	0.5	10	1	348.43	0.02891
30	0.5	0.6	-1	1	0.03	0.04	0.4	0.5	10	1	408.06	0.00341
30	0.5	0.6	-1	1	0.03	0.04	0.4	0.6	10	1	373.24	0.00213
30	0.2	0.5	-1	1	0.03	0.04	0.4	0.3	10	1	341.31	0.00637
20	0.5	0.6	-1	1	0.03	0.04	0.4	0.5	10	1	225.96	0.01319
40	0.3	0.6	-1	1	0.03	0.04	0.4	0.6	10	1	370.61	7e-05
30	0.3	0.4	-1	1	0.03	0.04	0.4	0.2	10	1	383.84	0.01216
20	0.7	0.7	-1	1	0.03	0.04	0.4	0.8	10	1	307.76	0.01115
30	0.4	0.4	-1	1	0.03	0.04	0.4	0.1	10	1	435.52	0.01667
20	0.8	0.7	-1	1	0.03	0.04	0.4	0.9	10	1	402.08	0.02077
50	0.5	0.6	-1	1	0.03	0.04	0.4	0.4	10	1	872.99	0.00063
20	0.7	0.7	-1	1	0.03	0.04	0.4	0.9	10	1	302.31	0.00954
20	0.6	0.6	-1	1	0.03	0.04	0.4	0.5	10	1	256.79	0.01764
50	0.4	0.7	-1	1	0.03	0.04	0.4	0.8	10	1	448.9	0
30	0.7	0.6	-1	1	0.03	0.04	0.4	0.6	10	1	573.69	0.00719
40	0.1	0.6	-1	1	0.03	0.04	0.4	0.4	10	1	374.29	0.00033
40	0.4	0.6	-1	1	0.03	0.04	0.4	0.6	10	1	446.02	0.00013
20	0.7	0.7	-1	1	0.03	0.04	0.4	0.7	10	1	311.78	0.01431
20	0.9	0.7	-1	1	0.03	0.04	0.4	0.8	10	1	542.78	0.04724
20	0.8	0.6	-1	1	0.03	0.04	0.4	0.6	10	1	350.62	0.02849
40	0.7	0.7	-1	1	0.03	0.04	0.4	0.7	10	1	837.61	0.00091
30	0.7	0.7	-1	1	0.03	0.04	0.4	0.7	10	1	582.39	0.0037
20	0.9	0.7	-1	1	0.03	0.04	0.4	0.7	10	1	520.2	0.04134
20	0.7	0.6	-1	1	0.03	0.04	0.4	0.5	10	1	296.46	0.02211
20	0.99	0.6	-1	1	0.03	0.04	0.4	0.5	10	1	487.82	0.06091
30	0.6	0.6	-1	1	0.03	0.04	0.4	0.5	10	1	482.19	0.00479
50	0.3	0.6	-1	1	0.03	0.04	0.4	0.7	10	1	419.45	0
40	0.3	0.6	-1	1	0.03	0.04	0.4	0.4	10	1	482.72	0.00081
40	0.01	0.5	-1	1	0.03	0.04	0.4	0.3	10	1	406.69	0.00121
50	0.01	0.6	-1	1	0.03	0.04	0.4	0.4	10	1	415.71	4e-05
20	0.99	0.6	-1	1	0.03	0.04	0.4	0.6	10	1	519.83	0.07714
30	0.4	0.5	-1	1	0.03	0.04	0.4	0.3	10	1	404.23	0.00806
20	0.9	0.6	-1	1	0.03	0.04	0.4	0.5	10	1	411.84	0.04017
40	0.4	0.6	-1	1	0.03	0.04	0.4	0.5	10	1	499.78	0.00043
30	0.3	0.4	-1	1	0.03	0.04	0.4	0.1	10	1	416.07	0.01771
40	0.1	0.5	-1	1	0.03	0.04	0.4	0.3	10	1	443.1	0.00154
30	0.5	0.6	-1	1	0.03	0.04	0.4	0.4	10	1	453.28	0.00577
50	0.2	0.7	-1	1	0.03	0.04	0.4	0.8	10	1	315.8	0
40	0.2	0.6	-1	1	0.03	0.04	0.4	0.4	10	1	434.81	0.00056
30	0.1	0.3	-1	1	0.03	0.04	0.4	0	10	1	389.14	0.02595
30	0.5	0.5	-1	1	0.03	0.04	0.4	0.3	10	1	445.11	0.00894
30	0.9	0.3	-1	1	0.03	0.04	0.4	0	10	1	422.22	0.00927
30	0.7	0.6	-1	1	0.03	0.04	0.4	0.4	10	1	594.59	0.00909
50	0.2	0.6	-1	1	0.03	0.04	0.4	0.5	10	1	462	0
50	0.2	0.6	-1	1	0.03	0.04	0.4	0.6	10	1	402.29	0
40	0.4	0.7	-1	1	0.03	0.04	0.4	0.7	10	1	396.62	3e-05
50	0.6	0.6	-1	1	0.03	0.04	0.4	0.4	10	1	1044.6	0.00099
30	0.99	0.4	-1	1	0.03	0.04	0.4	0.2	10	1	620.33	0.02006
30	0.01	0.3	-1	1	0.03	0.04	0.4	0	10	1	410.39	0.03353
30	0.1	0.4	-1	1	0.03	0.04	0.4	0.1	10	1	376.89	0.01801
50	0.5	0.7	-1	1	0.03	0.04	0.4	0.9	10	1	517.93	0
40	0.5	0.6	-1	1	0.03	0.04	0.4	0.6	10	1	545.78	0.00048
20	0.8	0.7	-1	1	0.03	0.04	0.4	0.8	10	1	399.23	0.02179
30	0.9	0.4	-1	1	0.03	0.04	0.4	0.1	10	1	512.14	0.01213
30	0.2	0.4	-1	1	0.03	0.04	0.4	0.1	10	1	392.59	0.01756
40	0.5	0.6	-1	1	0.03	0.04	0.4	0.5	10	1	599.15	0.001
30	0.6	0.7	-1	1	0.03	0.04	0.4	0.9	10	1	379.96	0.00047
20	0.99	0.7	-1	1	0.03	0.04	0.4	0.8	10	1	725.08	0.09293
30	0.6	0.6	-1	1	0.03	0.04	0.4	0.4	10	1	517.39	0.00754
30	0.01	0.4	-1	1	0.03	0.04	0.4	0.1	10	1	379.56	0.02173
30	0.8	0.7	-1	1	0.03	0.04	0.4	0.8	10	1	803.57	0.00752
30	0.6	0.3	-1	1	0.03	0.04	0.4	0	10	1	436.38	0.0164
30	0.5	0.4	-1	1	0.03	0.04	0.4	0.2	10	1	451.05	0.01392
30	0.8	0.7	-1	1	0.03	0.04	0.4	0.9	10	1	791.43	0.00732
30	0.8	0.3	-1	1	0.03	0.04	0.4	0	10	1	438.36	0.01154
50	0.1	0.6	-1	1	0.03	0.04	0.4	0.4	10	1	480.49	3e-05
30	0.8	0.6	-1	1	0.03	0.04	0.4	0.6	10	1	734.46	0.01379
20	0.99	0.7	-1	1	0.03	0.04	0.4	0.9	10	1	736.74	0.10663
30	0.8	0.6	-1	1	0.03	0.04	0.4	0.4	10	1	703.24	0.0121
50	0.5	0.7	-1	1	0.03	0.04	0.4	0.8	10	1	569.73	0
30	0.4	0.3	-1	1	0.03	0.04	0.4	0	10	1	419.04	0.0204
30	0.8	0.4	-1	1	0.03	0.04	0.4	0.1	10	1	497.35	0.01255
20	0.9	0.7	-1	1	0.03	0.04	0.4	0.9	10	1	557.52	0.04939
30	0.6	0.4	-1	1	0.03	0.04	0.4	0.2	10	1	478.28	0.01413
30	0.99	0.5	-1	1	0.03	0.04	0.4	0.3	10	1	787.61	0.02533
30	0.7	0.3	-1	1	0.03	0.04	0.4	0	10	1	452.24	0.01462
30	0.8	0.7	-1	1	0.03	0.04	0.4	0.7	10	1	789.52	0.00818
30	0.9	0.6	-1	1	0.03	0.04	0.4	0.4	10	1	833.58	0.01848
30	0.9	0.4	-1	1	0.03	0.04	0.4	0.2	10	1	565.4	0.01684
40	0.99	0.3	-1	1	0.03	0.04	0.4	0	10	1	607.58	0.00267
40	0.2	0.5	-1	1	0.03	0.04	0.4	0.3	10	1	500.1	0.00191
30	0.7	0.4	-1	1	0.03	0.04	0.4	0.1	10	1	491.14	0.01386
30	0.8	0.4	-1	1	0.03	0.04	0.4	0.2	10	1	544.09	0.01601
30	0.5	0.4	-1	1	0.03	0.04	0.4	0.1	10	1	456.04	0.01597
40	0.6	0.6	-1	1	0.03	0.04	0.4	0.6	10	1	666.65	0.00099
30	0.5	0.3	-1	1	0.03	0.04	0.4	0	10	1	431.52	0.01939
50	0.3	0.6	-1	1	0.03	0.04	0.4	0.6	10	1	469.33	2e-05
40	0.5	0.7	-1	1	0.03	0.04	0.4	0.7	10	1	487.44	5e-05
30	0.6	0.4	-1	1	0.03	0.04	0.4	0.1	10	1	478.01	0.01501
40	0.3	0.5	-1	1	0.03	0.04	0.4	0.3	10	1	548.68	0.00245
30	0.7	0.4	-1	1	0.03	0.04	0.4	0.2	10	1	508.56	0.01479
30	0.6	0.5	-1	1	0.03	0.04	0.4	0.3	10	1	507.43	0.01074
30	0.7	0.6	-1	1	0.03	0.04	0.4	0.5	10	1	585.59	0.00793
50	0.2	0.6	-1	1	0.03	0.04	0.4	0.4	10	1	561.1	0.00014
40	0.4	0.6	-1	1	0.03	0.04	0.4	0.4	10	1	562.83	0.00118
40	0.99	0.4	-1	1	0.03	0.04	0.4	0.1	10	1	799.03	0.00454
30	0.3	0.3	-1	1	0.03	0.04	0.4	0	10	1	416.03	0.02184
40	0.7	0.7	-1	1	0.03	0.04	0.4	0.9	10	1	745	0.0004
50	0.4	0.6	-1	1	0.03	0.04	0.4	0.6	10	1	564.68	3e-05
30	0.9	0.5	-1	1	0.03	0.04	0.4	0.3	10	1	701.81	0.01851
30	0.7	0.5	-1	1	0.03	0.04	0.4	0.3	10	1	544.94	0.01222
40	0.6	0.4	-1	1	0.03	0.04	0.4	0.2	10	1	759.29	0.00748
40	0.5	0.6	-1	1	0.03	0.04	0.4	0.4	10	1	665.82	0.00173
30	0.99	0.6	-1	1	0.03	0.04	0.4	0.4	10	1	1042.3	0.03141
40	0.9	0.3	-1	1	0.03	0.04	0.4	0	10	1	658.26	0.00504
40	0.6	0.7	-1	1	0.03	0.04	0.4	0.8	10	1	572.27	6e-05
50	0.3	0.6	-1	1	0.03	0.04	0.4	0.5	10	1	541.67	7e-05
40	0.6	0.6	-1	1	0.03	0.04	0.4	0.5	10	1	714.84	0.00167
40	0.2	0.4	-1	1	0.03	0.04	0.4	0.2	10	1	565.16	0.00545
50	0.6	0.7	-1	1	0.03	0.04	0.4	0.9	10	1	671.65	0
50	0.5	0.6	-1	1	0.03	0.04	0.4	0.7	10	1	613.85	2e-05
50	0.3	0.5	-1	1	0.03	0.04	0.4	0.3	10	1	737.57	0.00101
30	0.99	0.6	-1	1	0.03	0.04	0.4	0.6	10	1	1259.4	0.06194
40	0.4	0.5	-1	1	0.03	0.04	0.4	0.3	10	1	613.72	0.00313
30	0.99	0.6	-1	1	0.03	0.04	0.4	0.5	10	1	1160.4	0.04553
50	0.01	0.5	-1	1	0.03	0.04	0.4	0.3	10	1	516.68	0.00033
50	0.6	0.7	-1	1	0.03	0.04	0.4	0.8	10	1	728.74	2e-05
30	0.8	0.5	-1	1	0.03	0.04	0.4	0.3	10	1	611.27	0.01471
40	0.01	0.4	-1	1	0.03	0.04	0.4	0.2	10	1	501.13	0.00496
40	0.1	0.4	-1	1	0.03	0.04	0.4	0.2	10	1	519.36	0.00501
30	0.9	0.6	-1	1	0.03	0.04	0.4	0.6	10	1	978.34	0.02983
40	0.9	0.4	-1	1	0.03	0.04	0.4	0.1	10	1	811.7	0.00592
50	0.3	0.6	-1	1	0.03	0.04	0.4	0.4	10	1	631.68	0.00027
40	0.3	0.4	-1	1	0.03	0.04	0.4	0.2	10	1	600.72	0.00607
50	0.2	0.5	-1	1	0.03	0.04	0.4	0.3	10	1	653.58	0.00076
40	0.7	0.6	-1	1	0.03	0.04	0.4	0.5	10	1	905.96	0.00325
40	0.7	0.7	-1	1	0.03	0.04	0.4	0.8	10	1	795.09	0.00054
50	0.4	0.6	-1	1	0.03	0.04	0.4	0.5	10	1	645.78	0.00016
30	0.9	0.7	-1	1	0.03	0.04	0.4	0.9	10	1	1303.6	0.03392
30	0.99	0.7	-1	1	0.03	0.04	0.4	0.7	10	1	1715.4	0.06519
30	0.9	0.6	-1	1	0.03	0.04	0.4	0.5	10	1	901.97	0.02303
40	0.01	0.4	-1	1	0.03	0.04	0.4	0.1	10	1	629.08	0.01337
50	0.5	0.6	-1	1	0.03	0.04	0.4	0.6	10	1	697.38	7e-05
50	0.7	0.7	-1	1	0.03	0.04	0.4	0.9	10	1	940.26	3e-05
40	0.6	0.6	-1	1	0.03	0.04	0.4	0.4	10	1	773.89	0.00255
40	0.2	0.4	-1	1	0.03	0.04	0.4	0.1	10	1	642.25	0.00956
40	0.99	0.4	-1	1	0.03	0.04	0.4	0.2	10	1	1062.6	0.01236
30	0.9	0.7	-1	1	0.03	0.04	0.4	0.8	10	1	1223.1	0.02777
40	0.7	0.5	-1	1	0.03	0.04	0.4	0.3	10	1	885.5	0.00639
40	0.8	0.4	-1	1	0.03	0.04	0.4	0.1	10	1	824.66	0.00687
40	0.8	0.7	-1	1	0.03	0.04	0.4	0.9	10	1	1213.9	0.00262
50	0.99	0.3	-1	1	0.03	0.04	0.4	0	10	1	818.28	0.00115
50	0.4	0.6	-1	1	0.03	0.04	0.4	0.4	10	1	735.84	0.0004
40	0.5	0.5	-1	1	0.03	0.04	0.4	0.3	10	1	695.69	0.00435
30	0.99	0.7	-1	1	0.03	0.04	0.4	0.8	10	1	1771.3	0.0823
40	0.01	0.3	-1	1	0.03	0.04	0.4	0	10	1	698.1	0.02413
30	0.9	0.7	-1	1	0.03	0.04	0.4	0.7	10	1	1178.5	0.02416
50	0.1	0.5	-1	1	0.03	0.04	0.4	0.3	10	1	585.76	0.00047
40	0.7	0.6	-1	1	0.03	0.04	0.4	0.6	10	1	876.98	0.00281
40	0.4	0.4	-1	1	0.03	0.04	0.4	0.1	10	1	709.2	0.00922
50	0.6	0.6	-1	1	0.03	0.04	0.4	0.6	10	1	872.17	0.00026
40	0.6	0.5	-1	1	0.03	0.04	0.4	0.3	10	1	787.71	0.00497
40	0.5	0.4	-1	1	0.03	0.04	0.4	0.2	10	1	713.01	0.00688
40	0.4	0.4	-1	1	0.03	0.04	0.4	0.2	10	1	648.43	0.00615
40	0.7	0.6	-1	1	0.03	0.04	0.4	0.4	10	1	930.57	0.00415
40	0.6	0.4	-1	1	0.03	0.04	0.4	0.1	10	1	755.21	0.00804
40	0.5	0.4	-1	1	0.03	0.04	0.4	0.1	10	1	770.81	0.00912
40	0.4	0.3	-1	1	0.03	0.04	0.4	0	10	1	690.74	0.01235
40	0.7	0.4	-1	1	0.03	0.04	0.4	0.1	10	1	787.79	0.00769
40	0.9	0.5	-1	1	0.03	0.04	0.4	0.3	10	1	1152.1	0.01056
40	0.1	0.3	-1	1	0.03	0.04	0.4	0	10	1	655.95	0.01816
40	0.3	0.3	-1	1	0.03	0.04	0.4	0	10	1	686	0.01425
40	0.7	0.4	-1	1	0.03	0.04	0.4	0.2	10	1	842.06	0.00785
40	0.8	0.7	-1	1	0.03	0.04	0.4	0.8	10	1	1243.3	0.00352
40	0.2	0.3	-1	1	0.03	0.04	0.4	0	10	1	674.83	0.01595
40	0.6	0.3	-1	1	0.03	0.04	0.4	0	10	1	726.4	0.00973
40	0.1	0.4	-1	1	0.03	0.04	0.4	0.1	10	1	607.21	0.01022
40	0.99	0.6	-1	1	0.03	0.04	0.4	0.5	10	1	2206.9	0.03988
40	0.5	0.3	-1	1	0.03	0.04	0.4	0	10	1	709.71	0.01073
50	0.5	0.6	-1	1	0.03	0.04	0.4	0.5	10	1	779.54	0.00028
40	0.3	0.4	-1	1	0.03	0.04	0.4	0.1	10	1	681.92	0.00994
50	0.6	0.6	-1	1	0.03	0.04	0.4	0.7	10	1	816.63	0.00013
40	0.8	0.6	-1	1	0.03	0.04	0.4	0.6	10	1	1172.7	0.00702
30	0.99	0.7	-1	1	0.03	0.04	0.4	0.9	10	1	1835	0.10038
50	0.7	0.7	-1	1	0.03	0.04	0.4	0.8	10	1	1011	0.0001
40	0.99	0.5	-1	1	0.03	0.04	0.4	0.3	10	1	1383.8	0.01737
50	0.7	0.6	-1	1	0.03	0.04	0.4	0.4	10	1	1248.4	0.00166
40	0.9	0.6	-1	1	0.03	0.04	0.4	0.4	10	1	1404.2	0.01132
50	0.99	0.4	-1	1	0.03	0.04	0.4	0.1	10	1	1135.4	0.00263
50	0.8	0.6	-1	1	0.03	0.04	0.4	0.6	10	1	1717.3	0.00384
50	0.1	0.4	-1	1	0.03	0.04	0.4	0.1	10	1	858.51	0.00662
50	0.7	0.6	-1	1	0.03	0.04	0.4	0.6	10	1	1154.4	0.00103
50	0.01	0.4	-1	1	0.03	0.04	0.4	0.2	10	1	669.26	0.00201
40	0.8	0.3	-1	1	0.03	0.04	0.4	0	10	1	681.71	0.00619
40	0.8	0.6	-1	1	0.03	0.04	0.4	0.5	10	1	1140.1	0.00651
50	0.99	0.5	-1	1	0.03	0.04	0.4	0.3	10	1	2108.5	0.01301
50	0.1	0.4	-1	1	0.03	0.04	0.4	0.2	10	1	702.43	0.00225
50	0.9	0.3	-1	1	0.03	0.04	0.4	0	10	1	898.43	0.00189
40	0.8	0.6	-1	1	0.03	0.04	0.4	0.4	10	1	1119.5	0.00607
40	0.7	0.3	-1	1	0.03	0.04	0.4	0	10	1	717.45	0.00793
50	0.01	0.4	-1	1	0.03	0.04	0.4	0.1	10	1	902.63	0.00858
40	0.8	0.7	-1	1	0.03	0.04	0.4	0.7	10	1	1215	0.00342
50	0.9	0.4	-1	1	0.03	0.04	0.4	0.1	10	1	1154.6	0.00318
40	0.8	0.5	-1	1	0.03	0.04	0.4	0.3	10	1	982.65	0.00761
50	0.4	0.5	-1	1	0.03	0.04	0.4	0.3	10	1	839.56	0.00171
40	0.9	0.6	-1	1	0.03	0.04	0.4	0.5	10	1	1549.4	0.01531
50	0.5	0.5	-1	1	0.03	0.04	0.4	0.3	10	1	945.32	0.00195
50	0.8	0.3	-1	1	0.03	0.04	0.4	0	10	1	956.3	0.00304
50	0.7	0.4	-1	1	0.03	0.04	0.4	0.1	10	1	1161.5	0.00486
50	0.2	0.4	-1	1	0.03	0.04	0.4	0.2	10	1	767.84	0.00259
50	0.6	0.6	-1	1	0.03	0.04	0.4	0.5	10	1	954.57	0.00052
40	0.99	0.6	-1	1	0.03	0.04	0.4	0.4	10	1	1928.2	0.02361
40	0.9	0.7	-1	1	0.03	0.04	0.4	0.7	10	1	2005.8	0.01582
50	0.3	0.4	-1	1	0.03	0.04	0.4	0.2	10	1	830.96	0.00308
50	0.4	0.4	-1	1	0.03	0.04	0.4	0.1	10	1	1004	0.00556
50	0.8	0.4	-1	1	0.03	0.04	0.4	0.1	10	1	1132.2	0.004
50	0.6	0.5	-1	1	0.03	0.04	0.4	0.3	10	1	1052.1	0.00232
50	0.2	0.4	-1	1	0.03	0.04	0.4	0.1	10	1	913.03	0.00578
40	0.9	0.7	-1	1	0.03	0.04	0.4	0.8	10	1	2206.4	0.0199
40	0.99	0.7	-1	1	0.03	0.04	0.4	0.7	10	1	3305.9	0.06242
40	0.99	0.6	-1	1	0.03	0.04	0.4	0.6	10	1	2371.1	0.05665
50	0.7	0.6	-1	1	0.03	0.04	0.4	0.5	10	1	1203.9	0.00117
50	0.7	0.5	-1	1	0.03	0.04	0.4	0.3	10	1	1239.3	0.00328
50	0.3	0.4	-1	1	0.03	0.04	0.4	0.1	10	1	945.02	0.00595
50	0.8	0.7	-1	1	0.03	0.04	0.4	0.8	10	1	1633.4	0.00123
40	0.9	0.6	-1	1	0.03	0.04	0.4	0.6	10	1	1700.6	0.02016
40	0.9	0.4	-1	1	0.03	0.04	0.4	0.2	10	1	971.27	0.00968
40	0.8	0.4	-1	1	0.03	0.04	0.4	0.2	10	1	881.2	0.00836
50	0.7	0.4	-1	1	0.03	0.04	0.4	0.2	10	1	1202.3	0.00456
50	0.7	0.3	-1	1	0.03	0.04	0.4	0	10	1	1002.2	0.00444
50	0.7	0.6	-1	1	0.03	0.04	0.4	0.7	10	1	1106	0.00062
50	0.4	0.4	-1	1	0.03	0.04	0.4	0.2	10	1	914.52	0.00316
50	0.6	0.3	-1	1	0.03	0.04	0.4	0	10	1	1027.7	0.00564
50	0.5	0.4	-1	1	0.03	0.04	0.4	0.2	10	1	994.07	0.0039
50	0.8	0.6	-1	1	0.03	0.04	0.4	0.5	10	1	1632.8	0.00329
50	0.5	0.3	-1	1	0.03	0.04	0.4	0	10	1	994.91	0.00695
50	0.8	0.6	-1	1	0.03	0.04	0.4	0.4	10	1	1603.3	0.00353
50	0.6	0.4	-1	1	0.03	0.04	0.4	0.2	10	1	1078.8	0.0039
50	0.99	0.4	-1	1	0.03	0.04	0.4	0.2	10	1	1560.6	0.00869
50	0.4	0.3	-1	1	0.03	0.04	0.4	0	10	1	1016.9	0.00801
50	0.3	0.3	-1	1	0.03	0.04	0.4	0	10	1	1010.3	0.0097
50	0.2	0.3	-1	1	0.03	0.04	0.4	0	10	1	988.17	0.01074
50	0.8	0.7	-1	1	0.03	0.04	0.4	0.9	10	1	1614.8	0.00096
50	0.5	0.4	-1	1	0.03	0.04	0.4	0.1	10	1	1031.7	0.00524
50	0.8	0.4	-1	1	0.03	0.04	0.4	0.2	10	1	1249.8	0.00495
50	0.1	0.3	-1	1	0.03	0.04	0.4	0	10	1	971.97	0.01307
50	0.6	0.4	-1	1	0.03	0.04	0.4	0.1	10	1	1076.9	0.00448
50	0.8	0.5	-1	1	0.03	0.04	0.4	0.3	10	1	1439	0.00468
40	0.9	0.7	-1	1	0.03	0.04	0.4	0.9	10	1	2348.5	0.0246
40	0.99	0.7	-1	1	0.03	0.04	0.4	0.9	10	1	3580.7	0.09869
50	0.01	0.3	-1	1	0.03	0.04	0.4	0	10	1	1058.6	0.01913
50	0.9	0.4	-1	1	0.03	0.04	0.4	0.2	10	1	1372.5	0.00603
50	0.9	0.5	-1	1	0.03	0.04	0.4	0.3	10	1	1702.9	0.00704
40	0.99	0.7	-1	1	0.03	0.04	0.4	0.8	10	1	3428.9	0.07927
50	0.9	0.7	-1	1	0.03	0.04	0.4	0.8	10	1	3373.1	0.01474
50	0.9	0.6	-1	1	0.03	0.04	0.4	0.6	10	1	2615.1	0.01605
50	0.9	0.6	-1	1	0.03	0.04	0.4	0.5	10	1	2462.3	0.01109
50	0.8	0.6	-1	1	0.03	0.04	0.4	0.7	10	1	1742.2	0.00402
50	0.99	0.6	-1	1	0.03	0.04	0.4	0.6	10	1	4050	0.05586
50	0.99	0.6	-1	1	0.03	0.04	0.4	0.4	10	1	3012.9	0.01935
50	0.9	0.6	-1	1	0.03	0.04	0.4	0.4	10	1	2119.5	0.00712
50	0.99	0.6	-1	1	0.03	0.04	0.4	0.5	10	1	3548.3	0.0351
50	0.99	0.7	-1	1	0.03	0.04	0.4	0.8	10	1	5529.9	0.07609
50	0.9	0.7	-1	1	0.03	0.04	0.4	0.9	10	1	3623.1	0.01862
50	0.99	0.6	-1	1	0.03	0.04	0.4	0.7	10	1	4318.5	0.07927
50	0.9	0.6	-1	1	0.03	0.04	0.4	0.7	10	1	3004	0.02314
50	0.99	0.7	-1	1	0.03	0.04	0.4	0.9	10	1	5756.1	0.09645
